# Supplementary material for: Surfactant-mediated morphology and fluorescent properties of amino acids-based lanthanide coordination polymers
Source: Royal Society of Chemistry journal article supplement (doi:10.1039/c5ra11418g), 2015-01-01
Supplement: c5ra11418g1.pdf [file c5ra11418g1.pdf]

## Supporting Information

### **Surfactants-mediated morphology and fluorescent properties of amino acids- based lanthanide coordination polymers**

Hongliang Tan\*, Qian Li, Chanjiao Ma, Zhang-Hui Lu, Zheng Fu, Fugang Xu

Key Laboratory of Functional Small Organic Molecule, Ministry of Education, Key Laboratory of  
Chemical Biology of Jiangxi Province, College of Chemistry and Chemical Engineering, Jiangxi  
Normal University, Nanchang, 330022, P. R. China.

\*Corresponding author: E-mail: [hltan@jxnu.edu.cn](mailto:hltan@jxnu.edu.cn)

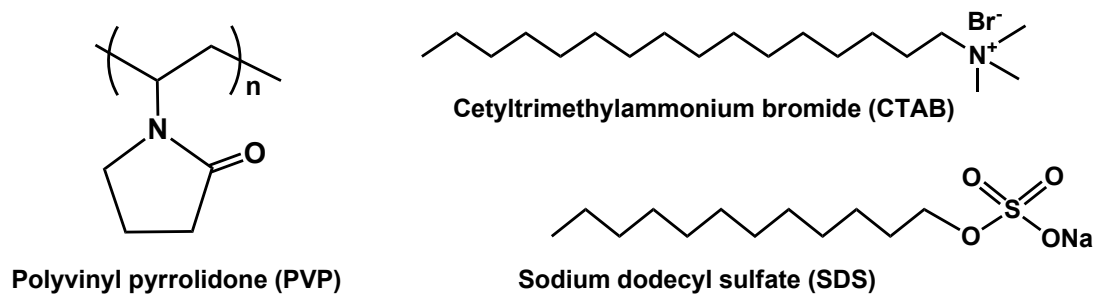

Figure S1. Chemical structures of surfactants CTAB, PVP and SDS.

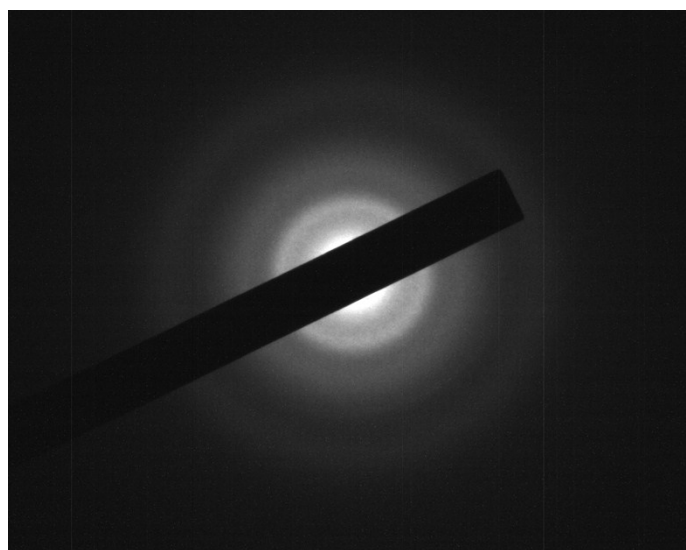

Figure S2. Selected area electron diffraction (SAED) image of Phe/Tb CPs.

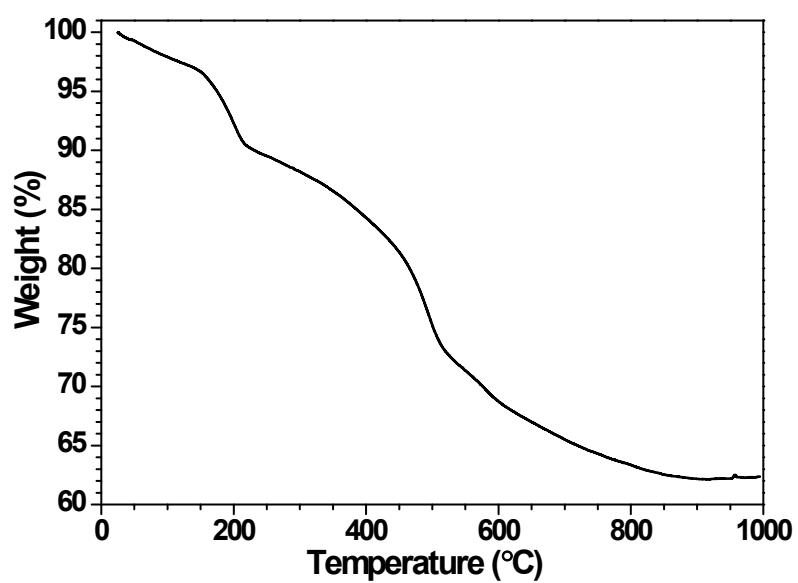

Figure S3. Thermogravimetric analysis of Phe/Tb CPs.

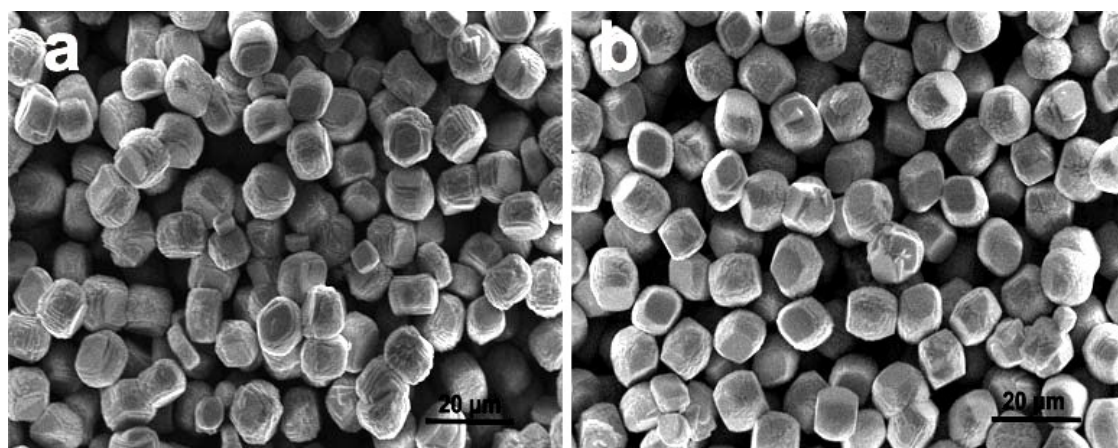

Figure S4. SEM images of Tb/Phe CPs prepared by using equal molar initial reactants of 50 mM (a) and 100 mM (b).

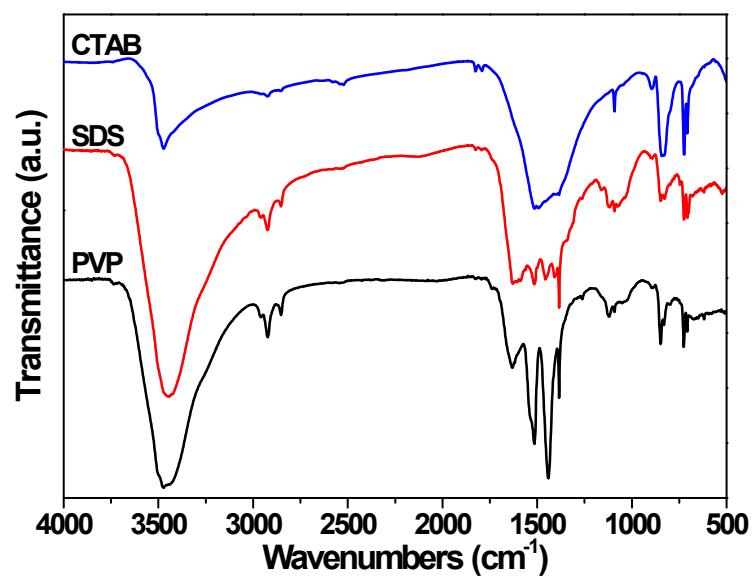

Figure S5. FTIR spectra of Phe/Tb CPs synthesized by the addition of CTAB, SDS and PVP (each 25 mg).

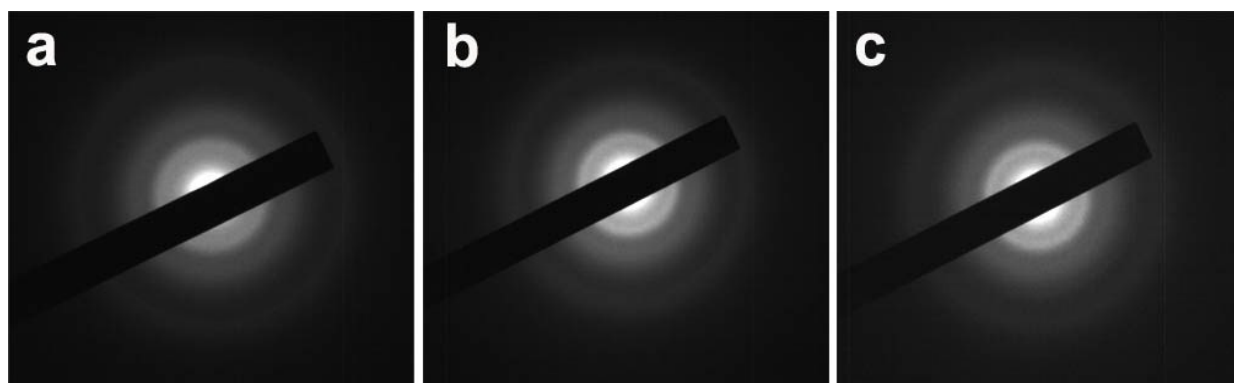

Figure S6. Selected area electron diffraction (SAED) images of Phe/Tb CPs in the presence of CTAB (a), SDS (b) and PVP (c).

**Table S1** EDS data for Tb/Phe in the presence of different surfactants.

| <b>Elements</b>      | <b>C (wt%)<sup>a</sup></b> | <b>O (wt%)<sup>a</sup></b> | <b>Tb (wt%)<sup>a</sup></b> | <b>N (wt%)<sup>a</sup></b> | <b>S (wt%)<sup>a</sup></b> | <b>Br (wt%)<sup>a</sup></b> |
|----------------------|----------------------------|----------------------------|-----------------------------|----------------------------|----------------------------|-----------------------------|
| <b>Tb/Phe + CTAB</b> | 17.12                      | 61.41                      | 27.82                       | 3.51                       |                            | 0.14                        |
| <b>Tb/Phe + SDS</b>  | 24.06                      | 58.80                      | 12.88                       | 3.76                       | 0.51                       |                             |
| <b>Tb/Phe + PVP</b>  | 16.92                      | 67.46                      | 12.28                       | 3.34                       |                            |                             |

<sup>a</sup> Atomic percents (wt%) are obtained from EDS data.
